# Supplementary material
Source: MDPI journal article supplement (https://www.mdpi.com/2073-445X/13/5/576)
Supplement: s1 [file s1]

**Table S1.** Data relevant to the ratio of interior floor space to the total footprint area in the Shirenzigou structures.

| Structures      | Indoor area (m <sup>2</sup> ) | Footprint area (m <sup>2</sup> ) |
|-----------------|-------------------------------|----------------------------------|
| F7(Upper level) | 204,3                         | 851,1                            |
| F7(Lower level) | 189,5                         | 348,6                            |
| F1              | 76,307                        | 127,846                          |
| F2              | 111,6                         | 177                              |
| F3              | 181,3                         | 269,6                            |
| F4              | 178,3                         | 278,3                            |
| F6              | 106,792                       | 137.746                          |

**Table S2.** Data relevant to the density of the features, ceramics and other artifacts (pottery, stone and metal items) in the Shirenzigou structures.

| Structure       | Max stove area (m <sup>2</sup> ) | Max ash pit area (m <sup>2</sup> ) | Total area of stove and ash pit (m <sup>2</sup> ) | Pottery shard/m <sup>2</sup> | Artifact/m <sup>2</sup> |
|-----------------|----------------------------------|------------------------------------|---------------------------------------------------|------------------------------|-------------------------|
| F7(Upper level) | 2,13                             | 6,97                               | 15,9                                              | 41,7                         | 0,8                     |
| F7(Lower level) | 1,8                              | 4,23                               | 11                                                | 121,9                        | 1,4                     |
| F1(Lower level) | 1,09                             | 2,28                               | 4,8                                               | 2                            | 0,4                     |
| F2(Upper level) | Unclear                          | 1,41                               | 3,1                                               | 3,4                          | 0,3                     |
| F2(Lower level) | 0,83                             | 1,48                               | 4,7                                               | Unclear                      | Unclear                 |
| F3(Upper level) | 0,66                             | 3,46                               | 9,8                                               | Unclear                      | Unclear                 |
| F3(Lower level) | 0,6                              | 0,95                               | 6,6                                               | 21,5                         | 0,4                     |
| F4(Upper level) | 0,92                             | 1,4                                | 8,5                                               | 5,5                          | 0,3                     |
| F6(Upper level) | 1,23                             | Unclear                            | Unclear                                           | Unclear                      | Unclear                 |

**Table S3.** Calibrated radiocarbon dates for Shirenzigou from the Accelerator Mass Spectrometry Dating Laboratory of Peking University and calibrated using OxCal and IntCal20 [64,65].

| Context | Laboratory number | Testing Institution | Material     | Uncalibrated Date BP | Error | Calibrated Age BCE at 95.4% | Reference  |
|---------|-------------------|---------------------|--------------|----------------------|-------|-----------------------------|------------|
| F7-H1   | BA061060          | Peking University   | Charcoal     | 2801                 | 50    | 1109-828                    | [122]      |
| F7-Y1   | BA061058          | Peking University   | Charcoal     | 2762                 | 45    | 1009-815                    | [122]      |
| F7-Z2   | BA061062          | Peking University   | Charcoal     | 2767                 | 40    | 1008-824                    | [122]      |
| DM5JM   | BA110577          | Peking University   | Caprine bone | 2748                 | 30    | 979-817                     | This study |
| F3DM7JM | BA110579          | Peking University   | Caprine bone | 2709                 | 25    | 904-810                     | This study |

|        |             |                   |                 |      |    |           |                  |
|--------|-------------|-------------------|-----------------|------|----|-----------|------------------|
| F7-H11 | BA110571    | Peking University | Caprine bone    | 2743 | 25 | 967-818   | <b>[61]</b>      |
| F7-H19 | BA110575    | Peking University | Caprine bone    | 2840 | 25 | 1108-917  | This study       |
| F7-H19 | Beta-497972 | Beta              | Highland Barley | 2796 | 30 | 1043-838  | <b>[32] [61]</b> |
| F7-H19 | Beta-497973 | Beta              | Wheat           | 2825 | 30 | 1107-901  | <b>[32] [61]</b> |
| F2-H57 | BA110572    | Peking University | Caprine bone    | 2835 | 30 | 1109-908  | This study       |
| F7-H25 | BA110574    | Peking University | Caprine bone    | 2811 | 25 | 1046-901  | <b>[61]</b>      |
| F1-H39 | BA110573    | Peking University | Caprine bone    | 2743 | 25 | 967-818   | This study       |
| F1-H31 | BA110568    | Peking University | Horse bone      | 2913 | 25 | 1204-1016 | <b>[61]</b>      |
